# Supplementary material
Source: HighWire-hosted journal article supplement (https://bmjopen.bmj.com/content/15/5/e092014)
Supplement: inline-supplementary-material-3 [file inline-supplementary-material-3.pdf]

Version 21.02.2023

|                    |                                                                                                           |
|--------------------|-----------------------------------------------------------------------------------------------------------|
| Inclusion criteria | Age: 18-100                                                                                               |
|                    | Consent possible                                                                                          |
|                    | cSDH located at the convexities                                                                           |
|                    | Patients with asymptomatic large chronic/subacute hematoma after 6 weeks of failed conservative treatment |
| Exclusion criteria | Consent not possible                                                                                      |
|                    | Pregnancy                                                                                                 |
|                    | Prisoner                                                                                                  |
|                    | Angiography contraindication                                                                              |
|                    | Patient from whom follow-up is problematic                                                                |
| Arm                | Previous surgery for cSDH                                                                                 |
|                    | 1                                                                                                         |
|                    | 2                                                                                                         |
|                    | 3                                                                                                         |
|                    | 4                                                                                                         |

|                 |                                    |           |              |                           |                            |
|-----------------|------------------------------------|-----------|--------------|---------------------------|----------------------------|
| Medical history | Comorbidities                      | Admission | At discharge | At 6-weeks post-treatment | At 6-months post-treatment |
|                 | Use of steroids                    |           |              |                           |                            |
|                 | Use of antithrombotic medication   |           |              |                           |                            |
|                 | Smoking status                     |           |              |                           |                            |
|                 | Alcohol abuse                      |           |              |                           |                            |
|                 | History of trauma                  |           |              |                           |                            |
|                 | COVID vaccination status           |           |              |                           |                            |
|                 | Time of COVID vaccination          |           |              |                           |                            |
|                 | Charleston comorbidity index score |           |              |                           |                            |
|                 |                                    |           |              |                           |                            |

|               |                 |                                     |  |  |  |
|---------------|-----------------|-------------------------------------|--|--|--|
| CT parameters | Unilateral cSDH | Hematoma volume (ml^3)              |  |  |  |
|               |                 | Maximum hematoma axial size (mm)    |  |  |  |
|               |                 | Maximum hematoma coronal size (mm)  |  |  |  |
|               |                 | Degree of midline shift (mm)        |  |  |  |
|               |                 | Recurrence                          |  |  |  |
|               | Bilateral cSDH  | Hematoma volume (ml^3)              |  |  |  |
|               |                 | Maximum hematoma sagittal size (mm) |  |  |  |
|               |                 | Maximum hematoma coronal size (mm)  |  |  |  |
|               |                 | Recurrence                          |  |  |  |
|               |                 |                                     |  |  |  |

|                          |                      |                                    |   |  |  |  |
|--------------------------|----------------------|------------------------------------|---|--|--|--|
| Glasgow Coma Scale (GCS) | Eye opening response | Spontaneously                      | 4 |  |  |  |
|                          |                      | To speech                          | 3 |  |  |  |
|                          |                      | To pain                            | 2 |  |  |  |
|                          |                      | No response                        | 1 |  |  |  |
|                          | Verbal response      | Not testable                       | 0 |  |  |  |
|                          |                      | Oriented to time, person and place | 5 |  |  |  |
|                          |                      | Confused                           | 4 |  |  |  |
|                          |                      | Inappropriate words                | 6 |  |  |  |
|                          | Motor response       | Incomprehensible sounds            | 2 |  |  |  |
|                          |                      | No response                        | 1 |  |  |  |
|                          |                      | Obeys command                      | 6 |  |  |  |
|                          |                      | Moves to localised pain            | 5 |  |  |  |
|                          |                      | Flex to withdraw from pain         | 4 |  |  |  |
|                          |                      | Abnormal flexion                   | 3 |  |  |  |
|                          |                      | Abnormal extension                 | 2 |  |  |  |
|                          |                      | No response                        | 1 |  |  |  |

|                                                   |                                                                                                                                                                                                                                                                                                                                                    |                                                                                                         |                                                                                                               |  |  |  |
|---------------------------------------------------|----------------------------------------------------------------------------------------------------------------------------------------------------------------------------------------------------------------------------------------------------------------------------------------------------------------------------------------------------|---------------------------------------------------------------------------------------------------------|---------------------------------------------------------------------------------------------------------------|--|--|--|
| modified Ranking Scale (mRS)                      | No symptoms                                                                                                                                                                                                                                                                                                                                        | 0                                                                                                       |                                                                                                               |  |  |  |
|                                                   | No significant disability. Able to carry out all usuak activities, despite some symptoms.                                                                                                                                                                                                                                                          | 1                                                                                                       |                                                                                                               |  |  |  |
|                                                   | Slight disability. Able to look after own affairs without assistance, but unable to carry out all previous activities.                                                                                                                                                                                                                             | 2                                                                                                       |                                                                                                               |  |  |  |
|                                                   | Moderate disability. Requires some help, but able to walk unassisted.                                                                                                                                                                                                                                                                              | 3                                                                                                       |                                                                                                               |  |  |  |
|                                                   | Moderate severe disability. Unable to attend to own bodily needs without assitance, and unable to walk unassisted.                                                                                                                                                                                                                                 | 4                                                                                                       |                                                                                                               |  |  |  |
|                                                   | Severe disability. Requires constant nursing care and attention, bedridden, incontinent.                                                                                                                                                                                                                                                           | 5                                                                                                       |                                                                                                               |  |  |  |
| Markwalder Grading Scale (MGS)                    | Dead                                                                                                                                                                                                                                                                                                                                               | 6                                                                                                       |                                                                                                               |  |  |  |
|                                                   | Patient neurologically normal.                                                                                                                                                                                                                                                                                                                     | 0                                                                                                       |                                                                                                               |  |  |  |
|                                                   | Patient alert and oriented; mild symptoms such as headache; absent or mild neurological deficit, such as reflex asymmetry.                                                                                                                                                                                                                         |                                                                                                         |                                                                                                               |  |  |  |
|                                                   | Patient drowsy or disoriented with variable neurological deficit, such as hemiparesis.                                                                                                                                                                                                                                                             | 1                                                                                                       |                                                                                                               |  |  |  |
|                                                   | Patient stuporous but responding appropriately to noxious stimuli; severe focal signs such as hemiplegia.                                                                                                                                                                                                                                          | 2                                                                                                       |                                                                                                               |  |  |  |
|                                                   | Patient comatose with absent motor responses to painful stimuli; decerebrate or decorticate posturing.                                                                                                                                                                                                                                             | 3                                                                                                       |                                                                                                               |  |  |  |
| Glasgow Outcome Scale - Extended (GOS-E)          |                                                                                                                                                                                                                                                                                                                                                    | 4                                                                                                       |                                                                                                               |  |  |  |
|                                                   | Dead.                                                                                                                                                                                                                                                                                                                                              | 1                                                                                                       |                                                                                                               |  |  |  |
|                                                   | Vegetative state. Absence of awateness of self and environnement.                                                                                                                                                                                                                                                                                  | 2                                                                                                       |                                                                                                               |  |  |  |
|                                                   | Lower severe disability. Needs full assistance in acitivities of daily living.                                                                                                                                                                                                                                                                     | 3                                                                                                       |                                                                                                               |  |  |  |
|                                                   | Upper severe disability. Needs partial assistance in acitivities of daily living.                                                                                                                                                                                                                                                                  | 4                                                                                                       |                                                                                                               |  |  |  |
|                                                   | Lower moderate disability. Indeoendent, but cannot resume work/school or all previous social activities.                                                                                                                                                                                                                                           | 5                                                                                                       |                                                                                                               |  |  |  |
|                                                   | Upper moderate disability. Some disability exists, but can partly resume work or previous activities.                                                                                                                                                                                                                                              | 6                                                                                                       |                                                                                                               |  |  |  |
|                                                   | Lower good recovery. Minor physioical or mental deficits that affects daily life.                                                                                                                                                                                                                                                                  | 7                                                                                                       |                                                                                                               |  |  |  |
| Karnofsky Performance Score (KPS)                 | Upper good recovery. Full recovery or minor symptoms that do not affect daily life.                                                                                                                                                                                                                                                                | 8                                                                                                       |                                                                                                               |  |  |  |
|                                                   | Normal, no complains, no evidence of disease.                                                                                                                                                                                                                                                                                                      | 100                                                                                                     |                                                                                                               |  |  |  |
|                                                   | Able to carry on normal activity; minor signs or symptoms of disease.                                                                                                                                                                                                                                                                              | 90                                                                                                      |                                                                                                               |  |  |  |
|                                                   | Normal activity with effort, some signs or symptoms of disease.                                                                                                                                                                                                                                                                                    | 80                                                                                                      |                                                                                                               |  |  |  |
|                                                   | Cares of self; unable to carry on normal activity or to do active work.                                                                                                                                                                                                                                                                            | 70                                                                                                      |                                                                                                               |  |  |  |
|                                                   | Requires occasional assistance, but is able to care for most of his/her personal needs.                                                                                                                                                                                                                                                            | 60                                                                                                      |                                                                                                               |  |  |  |
|                                                   | Requires considerable assistance and frequent medical care.                                                                                                                                                                                                                                                                                        | 50                                                                                                      |                                                                                                               |  |  |  |
|                                                   | Disabled; requires special care and assistance.                                                                                                                                                                                                                                                                                                    | 40                                                                                                      |                                                                                                               |  |  |  |
| Therapy-Disability-Neurology grading system (TDN) | Severely disabled; hospital admission is indicated although death not imminent.                                                                                                                                                                                                                                                                    | 30                                                                                                      |                                                                                                               |  |  |  |
|                                                   | Very sick; hospital admission necessary: active supportive treatment necessary.                                                                                                                                                                                                                                                                    | 20                                                                                                      |                                                                                                               |  |  |  |
|                                                   | Moribund; fatal processes progressing rapidly.                                                                                                                                                                                                                                                                                                     | 10                                                                                                      |                                                                                                               |  |  |  |
|                                                   | Dead.                                                                                                                                                                                                                                                                                                                                              | 0                                                                                                       |                                                                                                               |  |  |  |
|                                                   | Any adverse event without the need for a treatment or an intervention, which does not impact daily life activities, and does not result in any new neurological deficit. Allowed therapeutic modalities are drugs, such as antiemetics, antipyretics, analgetics, diuretics, electrolytes, physiotherapy, and bedside opening of wound infections. | Grade 1                                                                                                 |                                                                                                               |  |  |  |
|                                                   | Any adverse event requiring pharmacological treatment (including blood transfusions and total parenteral nutrition) or hindering at least one activity of daily living, or resulting in a new neurological deficit.                                                                                                                                | Grade 2                                                                                                 |                                                                                                               |  |  |  |
|                                                   | Any adverse event requiring an invasive procedure or hindering walking, or preventing the patient from attending his own bodily needs.                                                                                                                                                                                                             | Grade 3                                                                                                 |                                                                                                               |  |  |  |
|                                                   | Any life-threatening adverse event requiring a management in intensive care or leaving the patient bedridden, [or] in need of constant help, [or] incontinent.                                                                                                                                                                                     | Grade 4                                                                                                 |                                                                                                               |  |  |  |
| Re-admission for the same disease                 | Any adverse event resulting in the death of a patient.                                                                                                                                                                                                                                                                                             | Grade 5                                                                                                 |                                                                                                               |  |  |  |
|                                                   |                                                                                                                                                                                                                                                                                                                                                    |                                                                                                         |                                                                                                               |  |  |  |
|                                                   |                                                                                                                                                                                                                                                                                                                                                    |                                                                                                         |                                                                                                               |  |  |  |
|                                                   |                                                                                                                                                                                                                                                                                                                                                    |                                                                                                         |                                                                                                               |  |  |  |
|                                                   |                                                                                                                                                                                                                                                                                                                                                    |                                                                                                         |                                                                                                               |  |  |  |
|                                                   |                                                                                                                                                                                                                                                                                                                                                    |                                                                                                         |                                                                                                               |  |  |  |
|                                                   |                                                                                                                                                                                                                                                                                                                                                    |                                                                                                         |                                                                                                               |  |  |  |
|                                                   |                                                                                                                                                                                                                                                                                                                                                    |                                                                                                         |                                                                                                               |  |  |  |
| Mortality                                         |                                                                                                                                                                                                                                                                                                                                                    |                                                                                                         |                                                                                                               |  |  |  |
|                                                   |                                                                                                                                                                                                                                                                                                                                                    |                                                                                                         |                                                                                                               |  |  |  |
|                                                   |                                                                                                                                                                                                                                                                                                                                                    |                                                                                                         |                                                                                                               |  |  |  |
|                                                   |                                                                                                                                                                                                                                                                                                                                                    |                                                                                                         |                                                                                                               |  |  |  |
|                                                   |                                                                                                                                                                                                                                                                                                                                                    |                                                                                                         |                                                                                                               |  |  |  |
|                                                   |                                                                                                                                                                                                                                                                                                                                                    |                                                                                                         |                                                                                                               |  |  |  |
|                                                   |                                                                                                                                                                                                                                                                                                                                                    |                                                                                                         |                                                                                                               |  |  |  |
|                                                   |                                                                                                                                                                                                                                                                                                                                                    |                                                                                                         |                                                                                                               |  |  |  |
| Recommencement of anti-thrombotic treatment       |                                                                                                                                                                                                                                                                                                                                                    |                                                                                                         |                                                                                                               |  |  |  |
|                                                   |                                                                                                                                                                                                                                                                                                                                                    |                                                                                                         |                                                                                                               |  |  |  |
|                                                   |                                                                                                                                                                                                                                                                                                                                                    |                                                                                                         |                                                                                                               |  |  |  |
|                                                   |                                                                                                                                                                                                                                                                                                                                                    |                                                                                                         |                                                                                                               |  |  |  |
|                                                   |                                                                                                                                                                                                                                                                                                                                                    |                                                                                                         |                                                                                                               |  |  |  |
|                                                   |                                                                                                                                                                                                                                                                                                                                                    |                                                                                                         |                                                                                                               |  |  |  |
|                                                   |                                                                                                                                                                                                                                                                                                                                                    |                                                                                                         |                                                                                                               |  |  |  |
|                                                   |                                                                                                                                                                                                                                                                                                                                                    |                                                                                                         |                                                                                                               |  |  |  |
| SAE                                               | SAE information                                                                                                                                                                                                                                                                                                                                    | Participant ID                                                                                          |                                                                                                               |  |  |  |
|                                                   |                                                                                                                                                                                                                                                                                                                                                    | Year of birth                                                                                           |                                                                                                               |  |  |  |
|                                                   |                                                                                                                                                                                                                                                                                                                                                    | Sex                                                                                                     | F/M                                                                                                           |  |  |  |
|                                                   |                                                                                                                                                                                                                                                                                                                                                    | SAE onset date                                                                                          |                                                                                                               |  |  |  |
|                                                   |                                                                                                                                                                                                                                                                                                                                                    | SAE stop date                                                                                           |                                                                                                               |  |  |  |
|                                                   |                                                                                                                                                                                                                                                                                                                                                    | Date of SAE awareness                                                                                   |                                                                                                               |  |  |  |
|                                                   |                                                                                                                                                                                                                                                                                                                                                    | Report type                                                                                             | Initial / Follow-up / final                                                                                   |  |  |  |
|                                                   |                                                                                                                                                                                                                                                                                                                                                    | Narrative: describe the SAE and the connection to project procedures (including relevant test/lab data) |                                                                                                               |  |  |  |
|                                                   |                                                                                                                                                                                                                                                                                                                                                    | Study participant died                                                                                  | Yes/No                                                                                                        |  |  |  |
|                                                   |                                                                                                                                                                                                                                                                                                                                                    | requires inpatient treatment not envisaged in the protocol or extends a current hospital stay           | Yes/No                                                                                                        |  |  |  |
|                                                   |                                                                                                                                                                                                                                                                                                                                                    | is life-threatening                                                                                     | Yes/No                                                                                                        |  |  |  |
|                                                   |                                                                                                                                                                                                                                                                                                                                                    | causes a congenital anomaly or birth defect                                                             | Yes/No                                                                                                        |  |  |  |
|                                                   | Evaluation of event                                                                                                                                                                                                                                                                                                                                | Severity                                                                                                | mild / moderate /severe                                                                                       |  |  |  |
|                                                   |                                                                                                                                                                                                                                                                                                                                                    | Was this an unexpected SAE?                                                                             | Yes/No                                                                                                        |  |  |  |
|                                                   |                                                                                                                                                                                                                                                                                                                                                    | Outcome                                                                                                 | recovered-resolved / recovered -resolved with sequelae / study participant died / continuing / unknow / other |  |  |  |
|                                                   |                                                                                                                                                                                                                                                                                                                                                    | Did reaction abate after stopping the drug (or lowering the dose)?                                      | Yes/No/NA                                                                                                     |  |  |  |
|                                                   |                                                                                                                                                                                                                                                                                                                                                    | Did reaction reappear after reintroduction?                                                             | Yes/No/NA                                                                                                     |  |  |  |
|                                                   | Suspected drug(s) information                                                                                                                                                                                                                                                                                                                      | Suspected drug(s)                                                                                       |                                                                                                               |  |  |  |
|                                                   |                                                                                                                                                                                                                                                                                                                                                    | Route(s) of administration                                                                              |                                                                                                               |  |  |  |
|                                                   |                                                                                                                                                                                                                                                                                                                                                    | Indication(s) for use                                                                                   |                                                                                                               |  |  |  |
|                                                   | SAE causality                                                                                                                                                                                                                                                                                                                                      | Daily dose(s)                                                                                           |                                                                                                               |  |  |  |
|                                                   |                                                                                                                                                                                                                                                                                                                                                    | Therapy dates and duration                                                                              |                                                                                                               |  |  |  |
|                                                   |                                                                                                                                                                                                                                                                                                                                                    | Relationship of event to intervention                                                                   | Not related / Unlikely / Possible / Probably / Definitely                                                     |  |  |  |
|                                                   | Concomittant drug(s) and history                                                                                                                                                                                                                                                                                                                   | Concomittant drug(s) and dates of administration (exclude those used to treat event)                    |                                                                                                               |  |  |  |
|                                                   |                                                                                                                                                                                                                                                                                                                                                    | Other relevant history (e.g. diagnostics, allergies, etc.)                                              |                                                                                                               |  |  |  |
|                                                   | General ans reporter information                                                                                                                                                                                                                                                                                                                   |                                                                                                         |                                                                                                               |  |  |  |
|                                                   |                                                                                                                                                                                                                                                                                                                                                    | Title of research project (short title)                                                                 |                                                                                                               |  |  |  |
|                                                   |                                                                                                                                                                                                                                                                                                                                                    | BASEC research project number                                                                           |                                                                                                               |  |  |  |
|                                                   |                                                                                                                                                                                                                                                                                                                                                    | EC name (concerned EC)                                                                                  |                                                                                                               |  |  |  |
|                                                   |                                                                                                                                                                                                                                                                                                                                                    | EC name (dead EC, if applicable)                                                                        |                                                                                                               |  |  |  |
|                                                   |                                                                                                                                                                                                                                                                                                                                                    | Sponsor name and address (if different from investigator)                                               |                                                                                                               |  |  |  |
|                                                   |                                                                                                                                                                                                                                                                                                                                                    | Contact details of the site of SAE occurrence                                                           |                                                                                                               |  |  |  |
|                                                   |                                                                                                                                                                                                                                                                                                                                                    | Name and contact information of investigator                                                            |                                                                                                               |  |  |  |
|                                                   |                                                                                                                                                                                                                                                                                                                                                    | Place, date and signature of investigator                                                               |                                                                                                               |  |  |  |
|                                                   |                                                                                                                                                                                                                                                                                                                                                    |                                                                                                         |                                                                                                               |  |  |  |
