# Supplementary material
Source: HighWire-hosted journal article supplement (https://bmjopen.bmj.com/content/15/5/e092014)
Supplement: inline-supplementary-material-5 [file inline-supplementary-material-5.pdf]

Supplementary Table 1. Trial registration – data set

| Data category                                 | Information                                                                                                                                                                                                                                              |
|-----------------------------------------------|----------------------------------------------------------------------------------------------------------------------------------------------------------------------------------------------------------------------------------------------------------|
| Primary registry and trial identifying number | NCT06163547                                                                                                                                                                                                                                              |
| Date of registration in primary registry      | 11 <sup>th</sup> December, 2023                                                                                                                                                                                                                          |
| Secondary identifying numbers                 | BASEC2023-00848, SNCTP000005765, RP04-16.                                                                                                                                                                                                                |
| Primary sponsor                               | Fondation privée des HUG                                                                                                                                                                                                                                 |
| Secondary sponsor(s)                          | None                                                                                                                                                                                                                                                     |
| Contact for public queries                    | Karl Schaller MD [karl.schaller@hcuge.ch]                                                                                                                                                                                                                |
| Contact for scientific queries                | Karl Schaller MD [karl.schaller@hcuge.ch]                                                                                                                                                                                                                |
| Public title                                  | Middle Meningeal Artery (MMA) Embolization for chronic Subdural Hematomas                                                                                                                                                                                |
| Scientific title                              | Middle Meningeal Artery (MMA) Embolization for chronic Subdural Hematomas: Rationale and Design for the <b>STOp</b> Recurrence of <b>MMA</b> Bleeding (STORMM) Randomized-Control Trial                                                                  |
| Countries of recruitment                      | Switzerland                                                                                                                                                                                                                                              |
| Health condition(s) or problem(s) studied     | Chronic Subdural Hematomas, recurrence                                                                                                                                                                                                                   |
| Intervention(s)                               | Arm 1 (conventional management/control): surgery without embolization (randomized)                                                                                                                                                                       |
|                                               | Arm 2: MMA embolization within 72h of surgery (randomized)                                                                                                                                                                                               |
|                                               | Arm 3: MMA embolization only (not part of the randomization)                                                                                                                                                                                             |
|                                               | Arm 4: No treatment (not part of the randomization)                                                                                                                                                                                                      |
| Key inclusion and exclusion criteria          | Inclusion criteria: age 18-100, consent possible, chronic subdural hematoma (cSDH) located at the convexities, patients with symptomatic cSDH, patients with asymptomatic large chronic/subacute hematoma after 6 weeks of failed conservative treatment |
|                                               | Exclusion criteria: consent not possible, pregnancy, prisoner, angiography contraindication, patient for whom follow-up is problematic (e.g. distant residency, homeless...), previous surgery for cSDH                                                  |
| Study type                                    | Interventional                                                                                                                                                                                                                                           |
|                                               | Allocation: randomized (arms 1 & 2), non-randomized (arms 3 & 4)                                                                                                                                                                                         |
|                                               | Purpose: prevention of cSDH recurrence                                                                                                                                                                                                                   |
|                                               | Phase: not applicable                                                                                                                                                                                                                                    |
| Date of first enrolment                       | 1 <sup>st</sup> August, 2024                                                                                                                                                                                                                             |
| Target sample size                            | 180                                                                                                                                                                                                                                                      |
| Recruitment status                            | Pending                                                                                                                                                                                                                                                  |
| Primary outcome(s)                            | cSDH recurrence, defined as a cSDH reappearance that requires surgical reoperation, a neurological deterioration due to a cSDH                                                                                                                           |

|                        |                                                                                                                                                                                                                                                                                                               |
|------------------------|---------------------------------------------------------------------------------------------------------------------------------------------------------------------------------------------------------------------------------------------------------------------------------------------------------------|
|                        | after evacuation, or a postoperative hematoma volume of more than 90% of the preoperative volume at follow-up (time frame: 6 weeks and 6 months)                                                                                                                                                              |
| Key secondary outcomes | Efficacy of MMA Embolization in Isolation for Stopping cSDH Progression<br>Method of measurement: hematoma “regression”, “stability” and “progression” are defined radiologically as >10% reduction in volume, +/-10% of previous volume, >10% increase in hematoma volume (time frame: 6 weeks and 6 months) |
| Ethics Review          | Approved (16 <sup>th</sup> January 2024) by Geneva and Ticino Ethics Commission for Research [ccer@eta.ge.ch; dss-ce@ti.ch]                                                                                                                                                                                   |
