# Supplementary material
Source: HighWire-hosted journal article supplement (https://bmjopen.bmj.com/content/15/5/e092014)
Supplement: inline-supplementary-material-11 [file inline-supplementary-material-11.pdf]

1 **Statement of withdrawal of consent**

2  
3 Please read this form carefully. Do not hesitate to ask questions when you do not understand  
4 something or want clarification.  
5

|                                                                                                    |                                                                                                                                                                                                                                                                                                                                        |
|----------------------------------------------------------------------------------------------------|----------------------------------------------------------------------------------------------------------------------------------------------------------------------------------------------------------------------------------------------------------------------------------------------------------------------------------------|
| <b>BASEC number of the research project (after submission to the competent ethics commission):</b> | 2023-XXXX                                                                                                                                                                                                                                                                                                                              |
| <b>Title (scientific and usual):</b>                                                               | <b>Middle Meningeal Artery Embolization for Chronic Subdural Hematomas: A Randomized Clinical Trial to Determine the Likelihood of Recurrence After Embolization</b><br><br><b>Middle Meningeal Artery (MMA) Embolization for cSDH: Rationale and Design for the STOP Recurrence of MMA Bleeding (STORMM) Randomized-Control Trial</b> |
| <b>Responsible Institution (Sponsor and Full Address):</b>                                         | Pr. Karl Schaller<br>Neurosurgery Department<br>Department of Clinical Neurosciences<br>HUG<br>Rue Gabriel-Perret-Gentil, 4<br>1211 Geneva 14<br>Phone: +41 (0)22 372 82 02<br>email : Karl.Schaller@hcuge.ch                                                                                                                          |
| <b>Place of production:</b>                                                                        | Department of Neurosurgery, HUG                                                                                                                                                                                                                                                                                                        |
| <b>Investigator in charge on the site:</b><br>Name and first name in print:                        | Dr. Aria Nouri<br>Neurosurgery Department,<br>Department of Clinical Neurosciences<br>HUG<br>Rue Gabriel-Perret-Gentil, 4<br>Phone: +41 (0)795530958<br>Email: Aria.Nouri@hcuge.ch                                                                                                                                                     |
| <b>Participant:</b><br>First and last name in print:<br>Birth date:                                |                                                                                                                                                                                                                                                                                                                                        |

- 6  
7  
8  
9  
10  
11  
12  
13  
14  
15
- I declare that I have informed the team of the above-mentioned research project of the withdrawal of the patient's consent for his or her participation in this project.
  - I would like the patient's data to be stored in the form of:
    - ☐ Encoded: The data can only be linked to the patient by means of a key.
    - ☐ Anonymized: the code linking the patient's data to his or her person will be deleted, so no one will be able to know that this data is theirs. This process is primarily intended to ensure the protection of my data. I know that if I choose to have the data anonymized, I will no longer be able to be informed of any chance discoveries.

|                                                                      |                                                                                                                                                                                                                                                                                                                                                                                                                                                                                                                                                                                                                                                                                                                                                                                                                           |
|----------------------------------------------------------------------|---------------------------------------------------------------------------------------------------------------------------------------------------------------------------------------------------------------------------------------------------------------------------------------------------------------------------------------------------------------------------------------------------------------------------------------------------------------------------------------------------------------------------------------------------------------------------------------------------------------------------------------------------------------------------------------------------------------------------------------------------------------------------------------------------------------------------|
| Location, date                                                       | <div>First and last name in print</div> <div>Relationship with the patient:</div> <div><div><input type="checkbox"/> Person named in advance directives or in a power of attorney</div><div><input type="checkbox"/> Curator</div><div><input type="checkbox"/> Spouse or partner registered and providing regular personal assistance</div><div><input type="checkbox"/> Person living in common with the participant and providing regular personal assistance</div><div><input type="checkbox"/> Descending and providing regular personal assistance</div><div><input type="checkbox"/> Father/Mother and providing regular personal assistance</div><div><input type="checkbox"/> Brother/Sister and providing regular personal assistance</div></div> <div>Signature of the relative or legal representative:</div> |
| Name and first name of the investigating physician in block letters. |                                                                                                                                                                                                                                                                                                                                                                                                                                                                                                                                                                                                                                                                                                                                                                                                                           |
| Signature of the investigating physician                             |                                                                                                                                                                                                                                                                                                                                                                                                                                                                                                                                                                                                                                                                                                                                                                                                                           |
